# Supplementary material
Source: Elsevier journal article supplement (https://cris.unibo.it/retrieve/handle/11585/1045654/440dd3cb-283d-48f4-b605-8e3dbf569abf/mmc1.docx)
Supplement: mmc1 [file mmc1.docx]

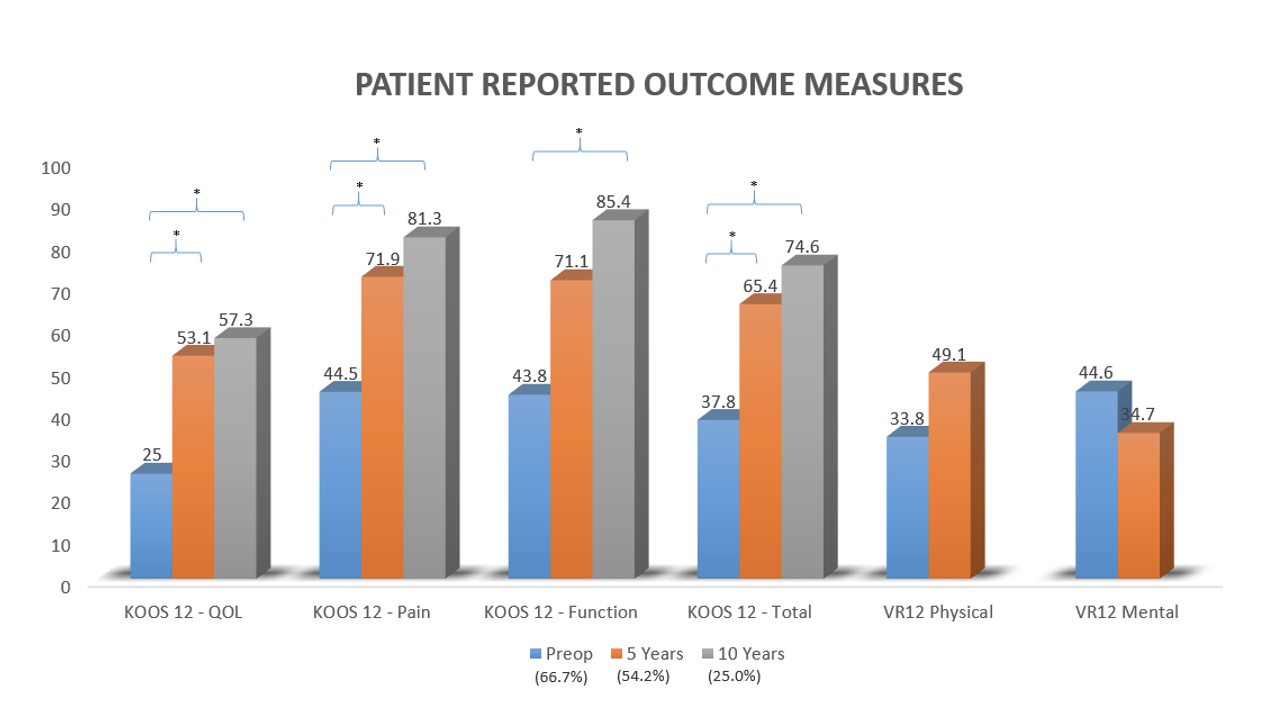


* Paired Samples T-Test (significant), KOOS Knee Injury And Osteoarthritis Outcome Score, VR-12 Veterans RAND-12, % available patients with completed clinical follow up

**Supplementary Material 1**. Preoperative, 5-years, and 10-years patient reported outcomes


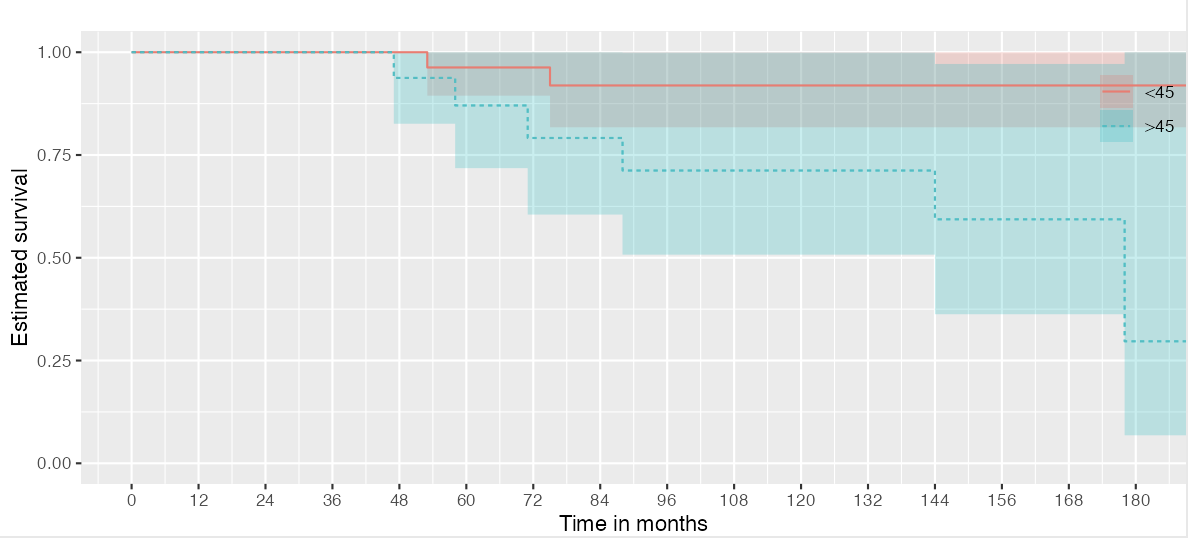


**Supplementary Material 2.** Survivorship based on Kaplan-Meier estimates for patients above, and below 45 years of age
